# Supplementary material
Source: PubMed Central journal article supplement (PMC7994988)
Supplement: ADTP-4-0-s001.pdf [file ADTP-4-0-s001.pdf]

## Supporting Information

1 **Drug repurposing of itraconazole and estradiol benzoate against COVID-19 by**  
2 **blocking SARS-CoV-2 spike protein-mediated membrane fusion**

3 *Chan Yang, Xiaoyan Pan, Yuan Huang, Chen Cheng, Xinfeng Xu, Yan Wu, Yunxia Xu,*  
4 *Weijuan Shang, Xiaoge Niu, Yihong Wan, Zhaofeng Li, Rong Zhang, Shuwen Liu\*,*  
5 *Gengfu Xiao\*, Wei Xu\**

6 These authors contributed equally: Chan Yang, Xiaoyan Pan

7 \*Correspondences: Wei Xu ([xuwei3322@smu.edu.cn](mailto:xuwei3322@smu.edu.cn)); Gengfu Xiao  
8 ([xiaogf@wh.iov.cn](mailto:xiaogf@wh.iov.cn)); Shuwen Liu ([liusw@smu.edu.cn](mailto:liusw@smu.edu.cn))

9 The file includes:

10 Figures. S1 to S5.

11 Materials and Methods.

12

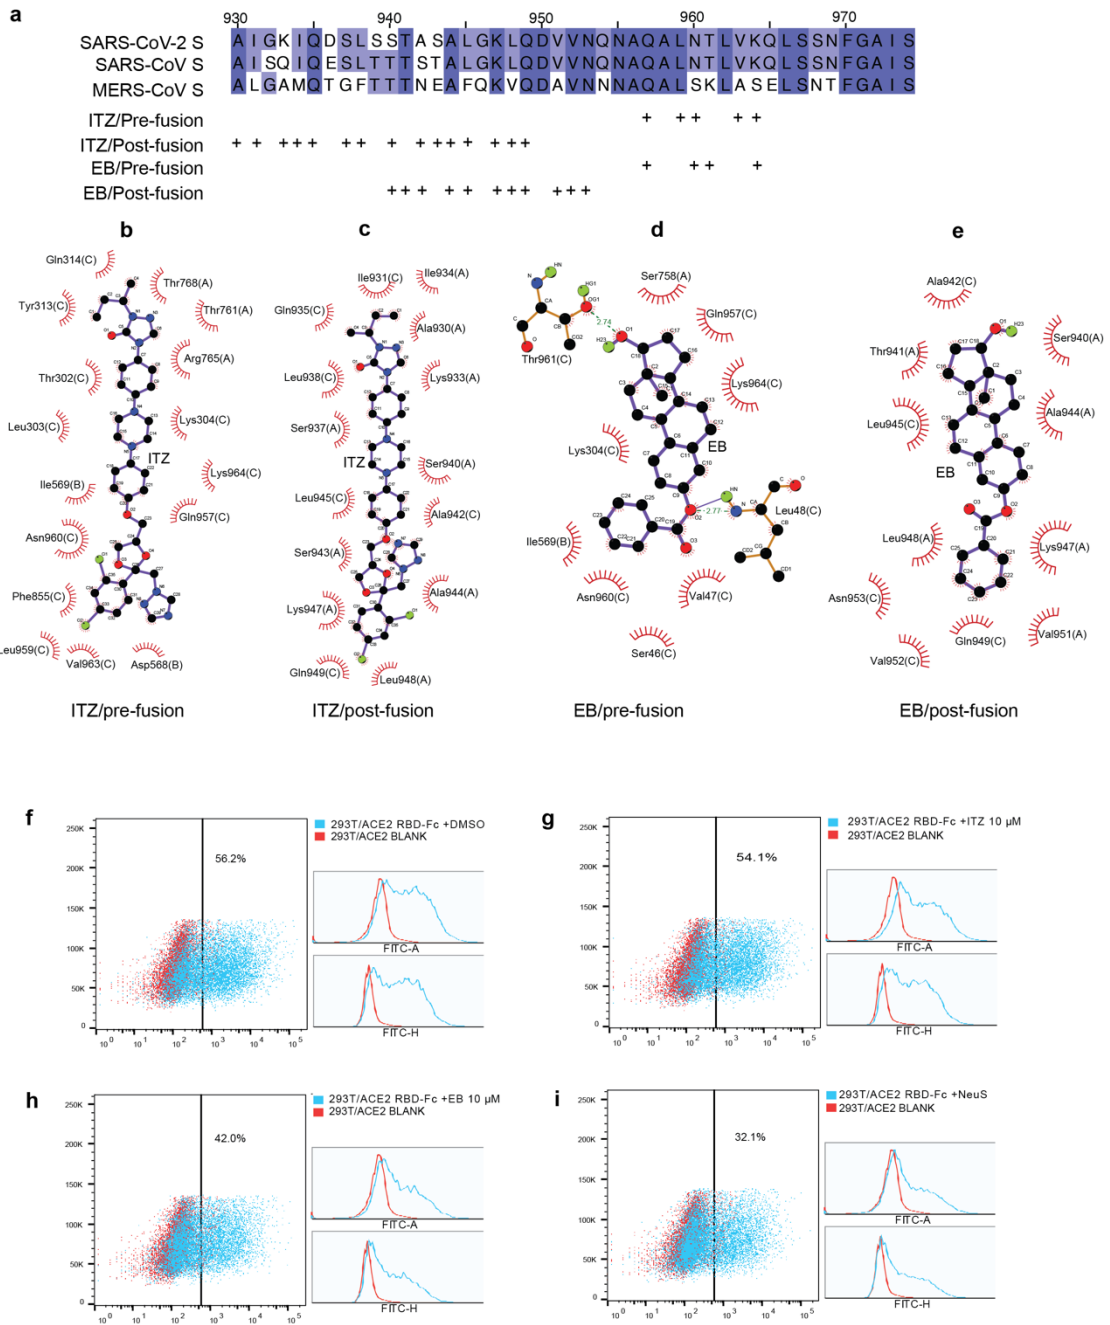

13 **Figure S1.** Binding details of ITZ/EB with pre-fusion and post-fusion S structures. a)

14 Sequence alignment of S protein HR1 region between residue 930 to residue 974

15 between SARS-CoV-2, SARS-CoV and MERS-CoV. “+” indicated the corresponding

16 residue involved in the interaction with ITZ or EB. b) Interaction details between ITZ

17 and pre-fusion S structure. c) Interaction details between ITZ and post-fusion S

18 structure. d) Interaction details between EB and pre-fusion S structure. e) Interaction

19 details between EB and post-fusion S structure. The figures are prepared by program  
20 LigPlot, hydrophobic contacts are represented by eyebrow, hydrogen bonds are  
21 represented by dotted lines. **f-i)** Flow cytometry analysis the binding of SARS-CoV-2  
22 RBD to hACE2 receptor. Mock-incubated 293T-ACE2 cells (red) were used as  
23 control. f) Fc-fused SARS-CoV-2 RBD protein (RBD-Fc, blue) bound strongly to  
24 293T-ACE2 cells. g) After treatment with 10 $\mu$ M of ITZ (blue), the positive signals  
25 for hFc (FITC) showed no difference with control group (red). h) The positive signals  
26 for hFc (FITC) of EB treated group (blue). Experiments were repeated twice and  
27 yielded similar results. i) The binding between SARS-CoV-2 RBD and cell-associated  
28 hACE2 receptor could be significantly blocked by neutralizing serum (NeuS, blue).

29

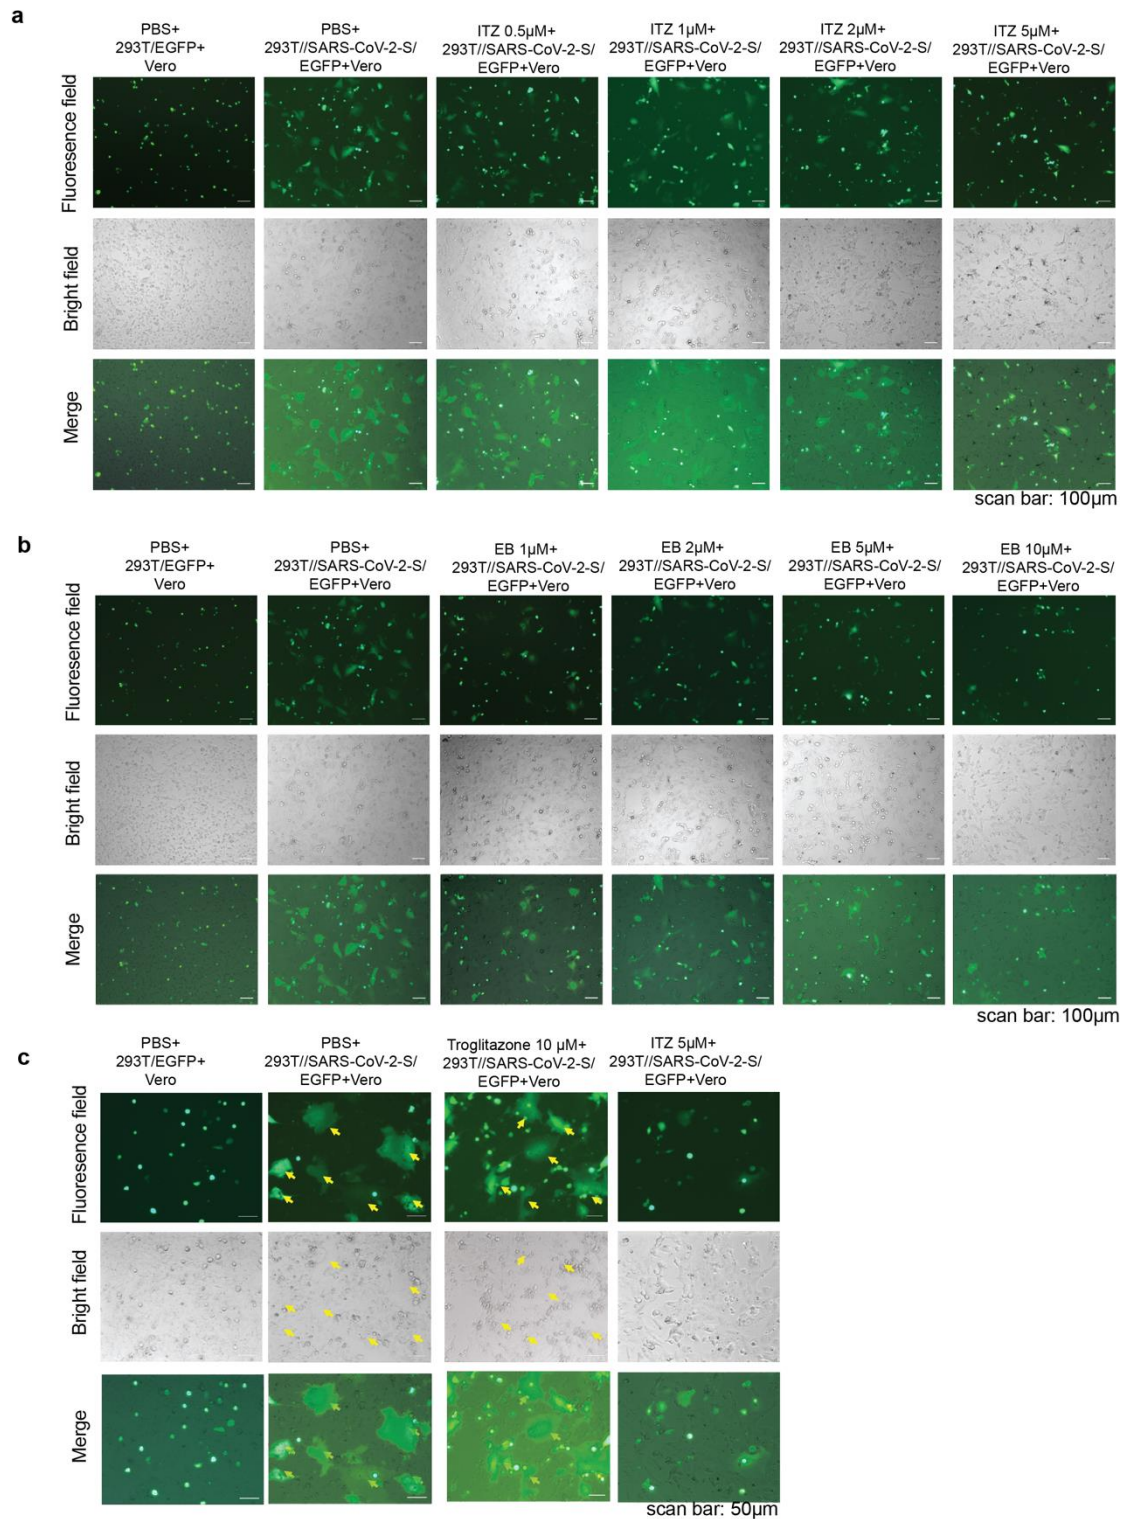

30 **Figure S2.** Images of ITZ or EB inhibiting SARS-CoV-2 S-mediated cell-cell fusion.  
 31 a,b) Schematic representation of SARS-CoV-2 S-mediated cell-cell fusion after  
 32 treatment with gradient concentrations of ITZ (a) or EB (b) for 24 h. Representative  
 33 results were shown from one field selected randomly each sample with scale bars of

34 100  $\mu\text{m}$ . c) Troglitazone was used as negative control in cell-cell fusion test.

35 Troglitazone showed no effects on spike-mediated cell-cell fusion.

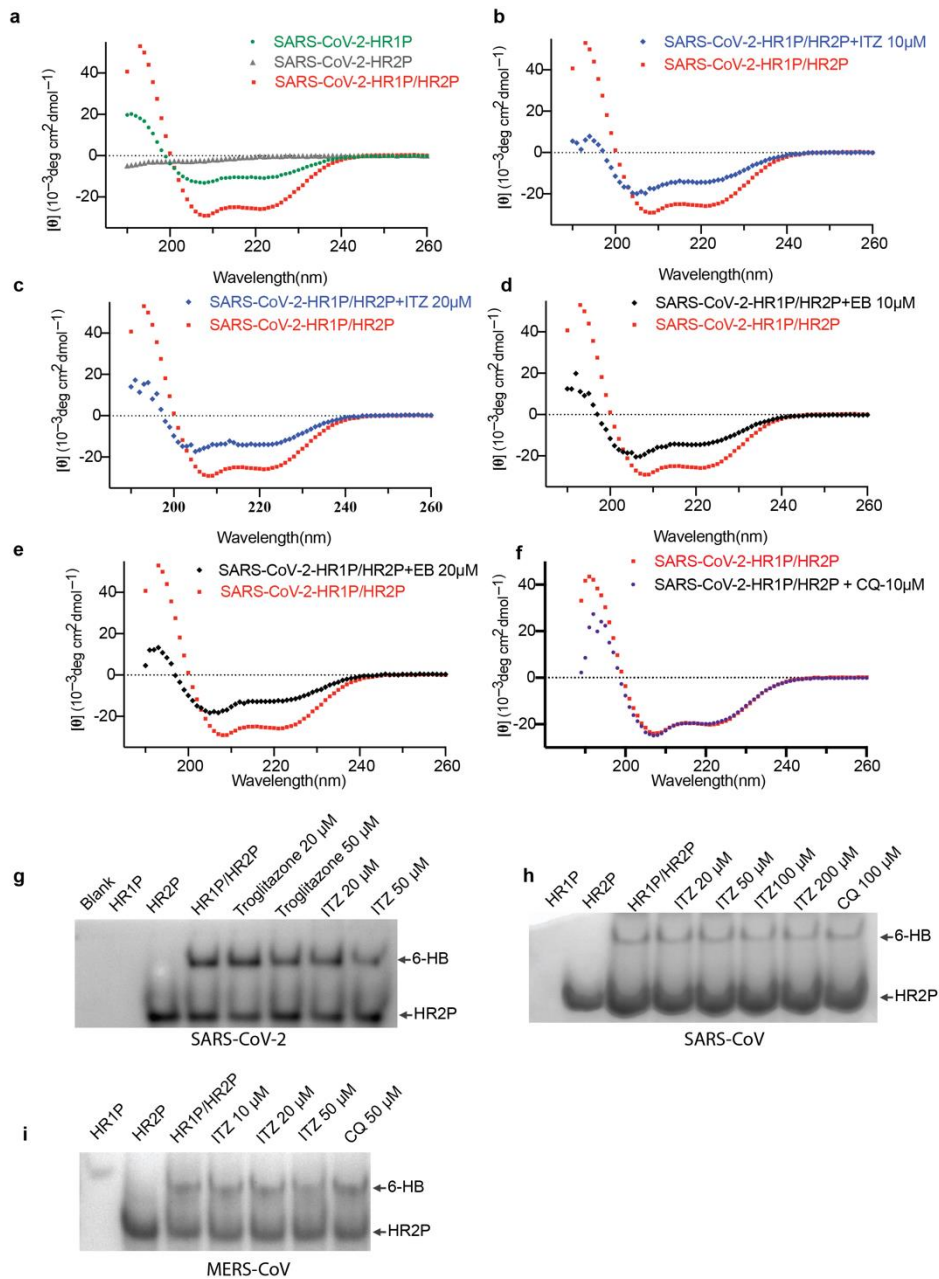

36 **Figure S3.** ITZ and EB reduced the formation of 6-HB. a) For the untreated control,  
 37 HR1 peptide (HR1P, green) was incubated with 50 mM phosphate buffer (pH7.2) for  
 38 30 min, and HR2 peptide (HR2P, gray) was added for a 30 min co-incubation. The  
 39 CD profile of HR1P/HR2P mixture is indicated in red, as determined by CD

40 spectroscopy, with the final concentration of each peptide being 10  $\mu\text{M}$ . b-e, f) For the  
41 experimental groups, HR1P was treated with indicated concentrations of ITZ (b,c),  
42 EB (d,e) or CQ (f) for 30 min, and the CD profile of HR1P/HR2P and ITZ or EB  
43 mixture showed the lower  $\alpha$ -helical. The experiments were performed three times, and  
44 the representative data were shown. g) N-PAGE assays for troglitazone and ITZ  
45 treatment with 20  $\mu\text{M}$  or 50  $\mu\text{M}$  to test the disrupting the formation of 6-HB. h, i)  
46 Dose-dependent inhibition of SARS-CoV 6-HB formation (h) and MERS-CoV 6-HB  
47 formation (i) by ITZ, as assessed by N-PAGE. SARS-CoV HR1R and SARS-CoV  
48 HR2P were mixed at equimolar concentration (50  $\mu\text{M}$ ) in the presence of ITZ at 0, 20,  
49 50, 100 and 200  $\mu\text{M}$ . MERS-CoV HR1P (35 $\mu\text{M}$ ) were pretreated with indicated  
50 concentration of ITZ, followed by the addition of HR2P (35 $\mu\text{M}$ ) and loading to the  
51 gel. CQ (50  $\mu\text{M}$ ) was used as the negative control.



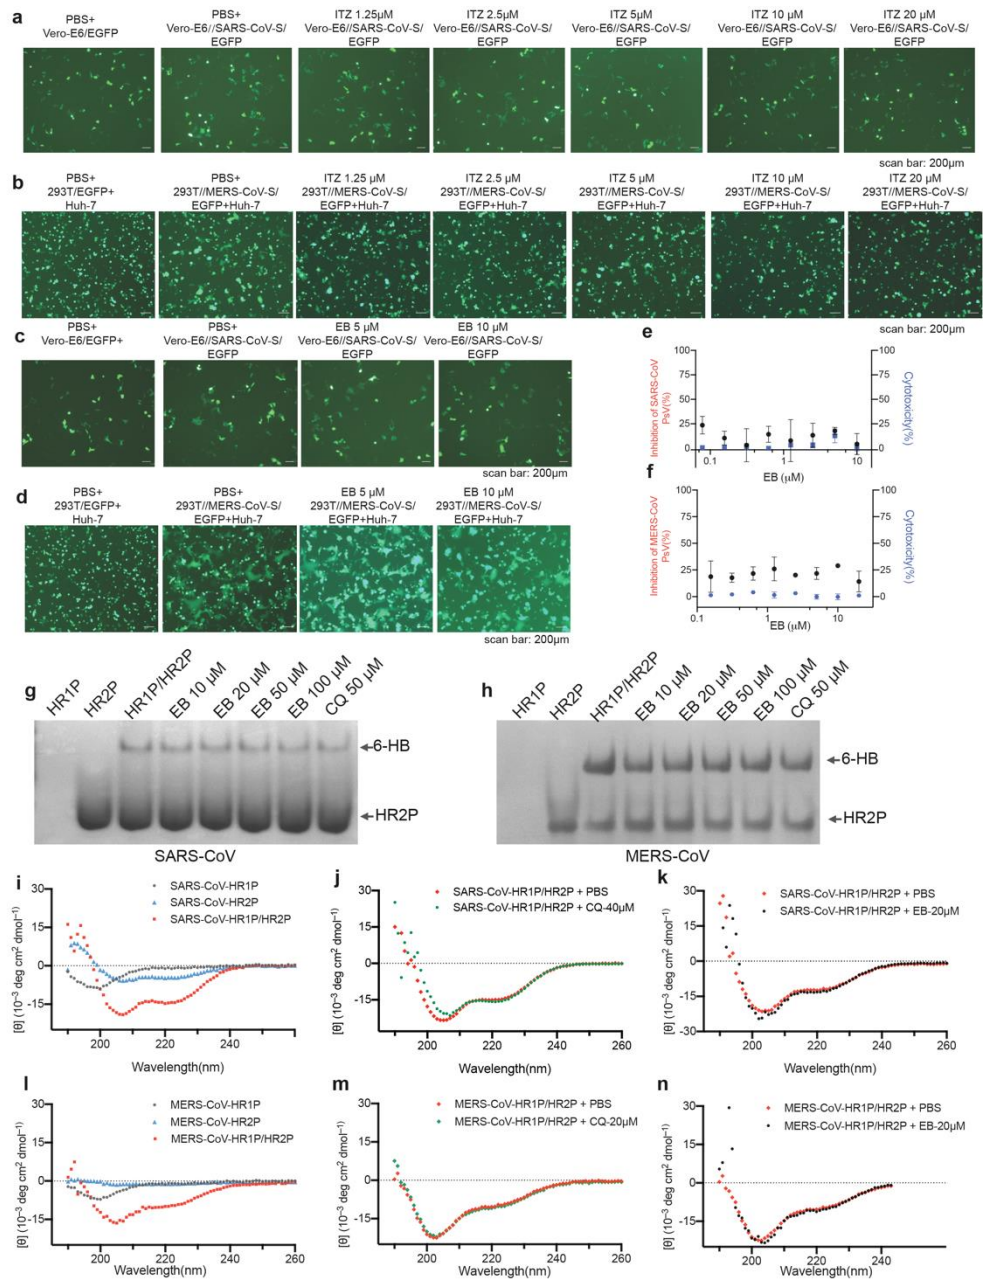

52 **Figure S4.** ITZ or EB blocked SARS-CoV S and MERS-CoV S by targeting to 6-HB.

53 a) Fluorescence images of ITZ inhibiting SARS-CoV S protein-mediated syncytium

54 formation. Vero-E6 cells transiently expressed SARS-CoV S protein and EGFP

55 (293T//SARS-CoV-S/EGFP). Then representative GFP-positive syncytia were

56 recorded following the description in the *Methods*, scale bars = 200  $\mu\text{m}$ . b)

57 Fluorescence images of ITZ inhibiting MERS-CoV S protein-mediated syncytium

58 formation. 293T cells transiently expressed MERS-CoV S protein and EGFP  
59 (293T//MERS-CoV-S/EGFP) as effector cells, while Huh-7 cells as host cells.  
60 Representative GFP-positive syncytia were recorded after treatment with ITZ. c)  
61 Fluorescence images of EB inhibiting SARS-CoV S protein-mediated syncytium  
62 formation. Vero-E6 cells transiently expressed SARS-CoV S protein and EGFP  
63 (Vero-E6//SARS-CoV-S/EGFP). Then representative GFP-positive syncytia were  
64 recorded following the description in the *Methods*, scale bars = 200  $\mu$ m. d)  
65 Fluorescence images of EB inhibiting MERS-CoV S protein-mediated syncytium  
66 formation. 293T cells transiently expressed MERS-CoV S protein and EGFP  
67 (293T//MERS-CoV-S/EGFP) as effector cells, while Huh-7 cells as host cells.  
68 Representative GFP-positive syncytia were recorded after treatment with EB. Three  
69 images per condition were acquired and processed with scale bars of 200  $\mu$ m.  
70 Different EB concentration treatment to inhibit SARS-CoV pseduovirus assay (e) or  
71 MERS-CoV pseduovirus assay(f). N-PAGE assay detection of EB has no effect on  
72 SARS-CoV 6-HB formation (g) or MERS-CoV 6-HB formation (h). CD profiles for  
73 SARS-CoV 6-HB (i), MERS-CoV 6-HB (l). j,m) 20 or 40  $\mu$ M CQ were used for  
74 negative control. k,n) EB (20  $\mu$ M) treatment shows no effect on the formation of  
75 SARS-CoV 6-HB (k) and MERS-CoV 6-HB (n).



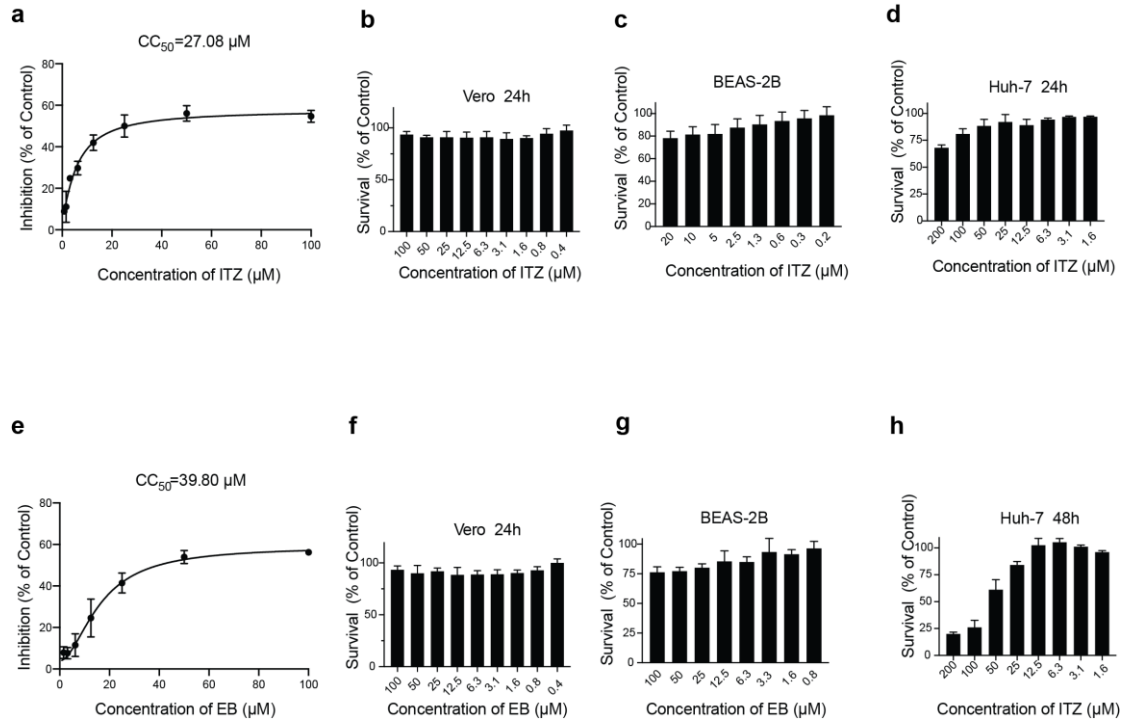

76 **Figure S5.** Cytotoxic effects of the ITZ and EB on different cell lines. a-d, h)  
 77 Cytotoxicity of ITZ, which was detected on 293T-ACE2 (a), Vero (b), BEAS-2B (c)  
 78 and Huh-7 (d, h) cells. e-g) Cytotoxic effects of EB on 293T-ACE2 (e), Vero (f) and  
 79 BEAS-2B (g) cells. Data represent mean of independent biological replicates, n=3.  
 80 Error bars: SD.  
 81

## 82 **Materials and Methods**

83 *Cell lines, drugs and peptides:* HEK-293T (Human, embryonic kidney), Vero  
84 (African green monkey, kidney) , Vero-E6 (African green monkey, kidney) and Huh-7  
85 (Human, liver) cells were cultivated in Dulbecco's Modified Eagle Medium (Gibco)  
86 supplemented with 10% fetal bovine serum (Capricorn Scientific), 100 U/mL of  
87 penicillin and 0.1 µg/mL of streptomycin (Gibco). HEK-293T cells that stably express  
88 human ACE2 (293T-ACE2) have been described previously<sup>1</sup> and were cultivated in  
89 the presence of 2 µg/mL puromycin (Invivogen). BEAS-2B (Human, epithelial cells  
90 were isolated from normal bronchial epithelium) was cultured in Lonza BEGM  
91 BulletKit (Lonza). All cell lines were obtained from ATCC (Manassas, VA) and were  
92 incubated at 37 °C and 5% CO<sub>2</sub> in a humidified atmosphere. ITZ and EB were  
93 purchased from TargetMol (China). The peptides, including SARS-CoV-2 HR1P  
94 (residues 924-965), SARS-CoV-2 HR2P (residues 1,168-1,203), SARS-CoV HR1P  
95 (residues 892-931), SARS-CoV HR2P (residues 1,153-1,189), MERS-CoV HR1P  
96 (residues 998-1,039) and MERS-CoV HR2P (residues 1,251-1,286) were synthesized  
97 by GL Biochem Ltd (China).

98 Plasmids encoding S glycoprotein (pAAV-IRES-EGFP-SARS-CoV-2 S,  
99 pAAV-IRES-EGFP-SARS-CoV S, pAAV-IRES-EGFP-MERS-CoV S) have been  
100 described previously. Plasmid pAAV-IRES-EGFP was purchased from Hedgehogbio  
101 Science and Technology Ltd.

102 *Ligand-protein interaction analysis:* For each drug docking, ten binding modes were  
103 analyzed and the pose with top score was selected according to the binding affinity

104 from computation, and further manually checked the interaction. The detailed  
105 interaction between ITZ or EB and pre-fusion or post-fusion S were made by ligplus.

106 *Flow cytometry assay:* SARS-CoV-2 RBD-Fc protein was expressed and purified  
107 from 293F cell. Flow cytometry analysis was carried out as described previously.  
108 Briefly, the 293T-ACE2 cells were plated in 12-well plates overnight. RBD-Fc protein  
109 (2  $\mu$ g/ml) were pre-incubated with different concentration of ITZ or EB at room  
110 temperature for 30 min. The mixture was added to 293T-ACE2 cells and incubation at  
111 37°C for 20 min. After staining with goat anti-human FITC-conjugated IgG antibody  
112 (1:500, Sigma), the cells were analyzed by flow cytometer (BD FACSCanto II) and  
113 Flowjo software.

114 *Cell-cell fusion assay:* To prepare effector cells (293T//SARS-CoV-2-S/EGFP),  
115 HEK-293T cells were transfected with pAAV-IRES-GFP-SARS-CoV-2 S or vehicle  
116 pAAV-IRES-GFP for 48 h with PolyJet (SignaGen) transfection. Target cells (Vero)  
117 were seeded in 96-well plates ( $10^4$  cells for each well) 4 h prior to cell-cell fusion  
118 assay. 293T//SARS-CoV-2-S/EGFP cells were incubated with ITZ or EB at room  
119 temperature for 30 min and were overlaid on Vero cells with  $2 \times 10^4$  cells/well.  
120 293T/EGFP cells were used as a negative control. After 24 h incubation, the samples  
121 were visualized by bright-field and fluorescence-field microscopy using a Zeiss  
122 scanner and the ZEN imaging software.

123 To prepare Vero-E6//SARS-CoV-S/EGFP cells as described before<sup>2</sup>, Vero-E6 cells  
124 were grown on coverslips in 24-well plates and transfected with  
125 pAAV-IRES-GFP-SARS-CoV S or pAAV-IRES-GFP with PolyJet (SignaGen)

126 transfection. After 6 h, Vero-E6//SARS-CoV-S/EGFP cells were treated with gradient  
127 concentrations of ITZ for 24 h. Cells were incubated for 1 hour in serum-free medium  
128 containing of 2 $\mu$ g/mL trypsin to induce fusion. The medium were replaced with fresh  
129 DMEM containing 10% FBS, and the cells were incubated for 6 h. Vero-E6/EGFP  
130 cells were used as a negative control. The samples were visualized by bright-field and  
131 fluorescence-field microscopy using a Zeiss scanner.

132 To prepare effector cells (293T//MERS-CoV-S/EGFP), HEK-293T cells were  
133 transfected with pAAV-IRES-GFP-MERS-CoV S or pAAV-IRES-GFP for 48 h with  
134 PolyJet (SignaGen) transfection. After Huh-7 cells were co-cultured with  
135 293T//MERS-CoV-S/EGFP or 293T/EGFP cells in the absence or presence of ITZ or  
136 EB for 48 h, cell-cell fusion were photographed under a Zeiss microscope with  
137 fluorescence or bright light.

138 *Native-PAGE (N-PAGE)*: N-PAGE was used to detect the inhibitory activity of ITZ  
139 or EB on formation of 6-HB between HR1P and HR2P (SARS-CoV-2/ SARS-CoV /  
140 MARS-CoV) as described previously. HR1P was dissolved in ddH<sub>2</sub>O, and HR2P was  
141 dissolved in phosphate buffer (pH 7.4). HR1P (30  $\mu$ M for SARS-CoV-2/ 50  $\mu$ M for  
142 SARS-CoV / 35  $\mu$ M for MARS-CoV) with or without indicated concentration of ITZ  
143 or EB were incubated at room temperature for 30 min, followed by the addition of  
144 HR2P (30  $\mu$ M for SARS-CoV-2/ 50  $\mu$ M for SARS-CoV / 35  $\mu$ M for MARS-CoV).  
145 The mixtures were incubated for another 30 min and separated by 18% Tris-glycine  
146 gel with constant 125V at room temperature for 2 h. The gel was stained with  
147 coomassie blue staining (HaoMa Biotechnology) and imaged with a Tanon 2500-B

148 scanner (Tanon Science & Technology).

149 *Circular dichroism (CD) spectroscopy:* CD spectra were monitored on a Chirascan  
150 plus ACD (Applied Photophysics Ltd). HR1P and HR2P (SARS-CoV-2/ SARS-CoV /  
151 MARS-CoV) were dissolved in buffer (0.1M KCl, 0.05M PO<sub>4</sub>, pH 7.2) at a final  
152 concentration of 10 μM. Briefly, HR1P were incubated with PBS or drugs at 25 °C for  
153 30 min, followed by addition of HR2P (10 μM). After further incubation for 30 min,  
154 the CD wave scans were measured from 190 to 260 nm at 4 °C with the bandwidth of  
155 2 nm and the step size of 1nm. The [θ]<sub>222</sub> value of -33,000 deg cm<sup>2</sup> dmol<sup>-1</sup> was taken  
156 to correspond to 100% α-helical content.

157 *Cytotoxicity assay:* Cytotoxicity of drugs to cells (Vero-E6, Vero, Huh-7, 293T-ACE2,  
158 BEAS-2B) was detected by Cell Counting Kit-8 (CCK-8) (Topscience). Briefly, cells  
159 were seeded into 96-well plates (10<sup>4</sup> per well) and cultured at 37 °C overnight. A total  
160 100 μl of DMEM containing indicated concentrations of ITZ or EB was added to cells.  
161 Following 24, 48 or 72 h incubation, 10 μl of CCK-8 solution was dropped to each  
162 well 4 h prior to the measurement of absorbance at 450 nm.
